# Supplementary material
Source: PubMed Central journal article supplement (PMC6007123)
Supplement: AEM.00501-18_zam013188586s1.pdf [file AEM.00501-18_zam013188586s1.pdf]

# **An ATP-dependent ligase with substrate flexibility involved in assembly of the peptidyl nucleoside antibiotic polyoxin**

Rong Gong,<sup>1</sup> Jianzhao Qi,<sup>1</sup> Pan Wu,<sup>1</sup> You-sheng Cai,<sup>1</sup> Hongmin Ma,<sup>1</sup> Yang Liu,<sup>1</sup> He Duan,<sup>1</sup> Meng Wang,<sup>1</sup> Zixin Deng,<sup>1,2</sup> Neil P. J. Price,<sup>3</sup> Wenqing Chen<sup>1,2\*</sup>

<sup>1</sup>Key Laboratory of Combinatorial Biosynthesis and Drug Discovery, Ministry of Education, and School of Pharmaceutical Sciences, Wuhan University, Wuhan 430071, China.

<sup>2</sup>State Key Laboratory of Microbial Metabolism, and School of Life Sciences and Biotechnology, Shanghai Jiao Tong University, Shanghai 200030, China.

<sup>3</sup>Agricultural Research Service, US Department of Agriculture, National Center for Agricultural Utilization Research, Peoria, IL, USA.

For correspondence: **Wenqing Chen**, Key Laboratory of Combinatorial Biosynthesis and Drug Discovery, Ministry of Education, and School of Pharmaceutical Sciences, Wuhan University, Wuhan 430071, China. \*E-mail: [wqchen@whu.edu.cn](mailto:wqchen@whu.edu.cn), Tel: +86-27-68756713

## Table of Contents

### 1. Supplementary Materials and Methods

- 1.1 Enzymes, chemicals, and reagents
- 1.2 In-frame deletion of the target *polG* gene by PCR-targeting strategy
- 1.3 Cultivation and metabolite analysis of the CXR14::pCHW201 and its derivative
- 1.4 Enzymatic preparation of NIK-Cx
- 1.5 Production and purification of PolG and its variants in *E. coli*.

### 2. Supplementary Figures

- Figure S1. HPLC and LC-HRMS analysis of the metabolites produced from the CXR14::pCHW201.
- Figure S2. <sup>1</sup>H NMR and <sup>13</sup>C NMR data of POL-B.
- Figure S3. <sup>1</sup>H NMR and <sup>13</sup>C NMR data of POL-J.
- Figure S4. In-frame deletion of *polG* on pCHW201 and HPLC/LC-HRMS analysis of the target metabolites produced by CXR14::pCHW201/ $\Delta$ *polG* recombinant.
- Figure S5. <sup>1</sup>H NMR and <sup>13</sup>C NMR data of POL-C.
- Figure S6. <sup>1</sup>H NMR, <sup>13</sup>C NMR and 2D-NMR data of thymine POL-C.
- Figure S7. LC-HRMS analysis of CPOAA produced from CXR14::pCHW201/ $\Delta$ *polG* recombinant.
- Figure S8. Bioinformatics analysis of PolG with its homologs.
- Figure S9. LC-HRMS analysis of the PolG-catalyzed reactions.
- Figure S10. HPLC and LC-HRMS analysis of PolG-catalyzed reaction using NIK-Cx as substrate.
- Figure S11. Structural comparison of RizA and PolG proteins.
- Figure S12. SDS-PAGE analysis and *in vitro* characterization of PolG variants.
- Figure S13. LC-HRMS analysis of the proposed mechanism of PolG-catalyzed reaction.
- Figure S14. Phylogenetic analysis of PolG against other ATP-dependent ligases.

### 3. Supplementary Tables

- Table S1. Optimized sequence for PolG
- Table S2. PCR primers used in this study

### 4. Supplementary References

## 1. Supplementary Materials and Methods

### 1.1 Enzymes, chemicals, and reagents

The restriction enzymes and T4 DNA ligase used in this study were the products of New England Biolabs, and DNA polymerase was purchased from TOYOBO Life Science (high fidelity KOD plus) or Takara (rTaq).

### 1.2 In-frame deletion of the target *polG* gene by PCR-targeting strategy

For targeted inactivation of *polG* on pCHW201, a kanamycin resistance cassette (*neo*) from SuperCos1 was amplified with primers *polG*tgtF and *polG*tgtR (Table S2), and then recombined into pCHW201 by PCR-targeting strategy (1) to yield pCHW201/*polG-neo*. After that, the *neo* cassette was deleted *in vitro* by XbaI-SpeI double digestion (unique sites), and religated to generate the in-frame deletion scar of the target gene (pCHW201/ $\Delta$ *polG*) (Fig. S1). The in-frame deletion was subsequently confirmed by PCR using primers *polG*idF and *polG*idR (Table S2).

### 1.3 Cultivation and metabolite analysis of the CXR14::pCHW201 and its derivative

CXR14::pCHW201 and its derivative CXR14::pCHW201/ $\Delta$ *polG* were both cultivated in liquid fermentation medium according to the protocol described previously (2). Then the culture broth was acidified to pH3.0-4.0 with oxalic acid, and purified by Dowex 50W  $\times$  8(H<sup>+</sup>), then concentrated and filtered for HPLC or LC-HRMS analysis.

For the purification of the target metabolites, the samples were separated on a HPLC (Shimadzu LC-20AT) equipped with ZORBA SB-C18 Column (Agilent, 5  $\mu$ m, 9.4  $\times$  250 mm) with a linear gradient of 5%-35% phase B (phase A, aqueous 0.15% TFA; phase B, MeOH) over 30 min at flow rate of 3 ml/min, the elutions were monitored by a DAD detector at 263 nm. The preparation of CPOAA was performed on HPLC (Shimadzu HPLC-ELSD) with a reverse phase C18 column (Inertsil ODS-3, 4.6  $\times$  250 mm, 5  $\mu$ m) following the same program as above except for the flow rate (1 ml/min).

#### **1.4 Enzymatic preparation of NIK-Cx**

The enzymatic reaction consisting of 50 mM Tris-HCl (pH 8.0), 5 mM NIK-X and 1 mg/ml Pronase E was incubated at 25°C for 16 hr (3). NIK-Cx was purified by HPLC using the gradient described above for POL preparation, but monitored at 287 nm by a DAD detector.

#### **1.5 Production and purification of PolG and its variants in *E. coli*.**

The optimized *polG* structural gene (Table S1) was cloned to the NdeI-EcoRI sites of pET28a, and the expression construct was subsequently transformed into *E. coli* Rosseta(DE3)/pLysS.

Expression and purification for His<sub>6</sub>-tagged proteins were performed as follows: cells were grown at 37°C in LB medium (50 µg/ml kanamycin and 25 µg/ml chloramphenicol) until an OD<sub>600</sub> of 0.6. Cooling for 10 min on ice, the cells were then induced with 0.15 mM (final conc.) β-D-1-thiogalactopyranoside (IPTG) for 24 hr at 15°C. After that, the cells were harvested by centrifugation (5,000 r/min, 10 min, 4°C), re-suspended in 30 ml lysis buffer (25 mM Tris, pH 8.0, 150 mM NaCl, 5 mM imidazole) and lysed by ultrasonication on ice. Cellular debris was removed by centrifugation (10,000 r/m, 20 min, 4°C). After incubation with 1 ml of Ni-NTA agarose resin (Qiagen) on ice for 1 hr, the supernatant (soluble proteins)-resin mixture was loaded onto a gravity flow column. Washed with washing buffer (25 mM Tris, pH 8.0, 150 mM NaCl, and 20 mM imidazole) and the proteins were subsequently eluted with elution solution (25 mM Tris-Cl, pH 8.0, 150 mM NaCl, and 200 mM imidazole), the purified protein was evaluated by 12% SDS-PAGE. Protein concentration was determined by the Bradford assay using serum albumin as the standard. PolG yield in *E. coli* Rosseta(DE3)/pLysS was 847.59 µg/l. Finally, the proteins were flash-frozen and stored at -40°C for further use.

## 2. Supplementary Figures

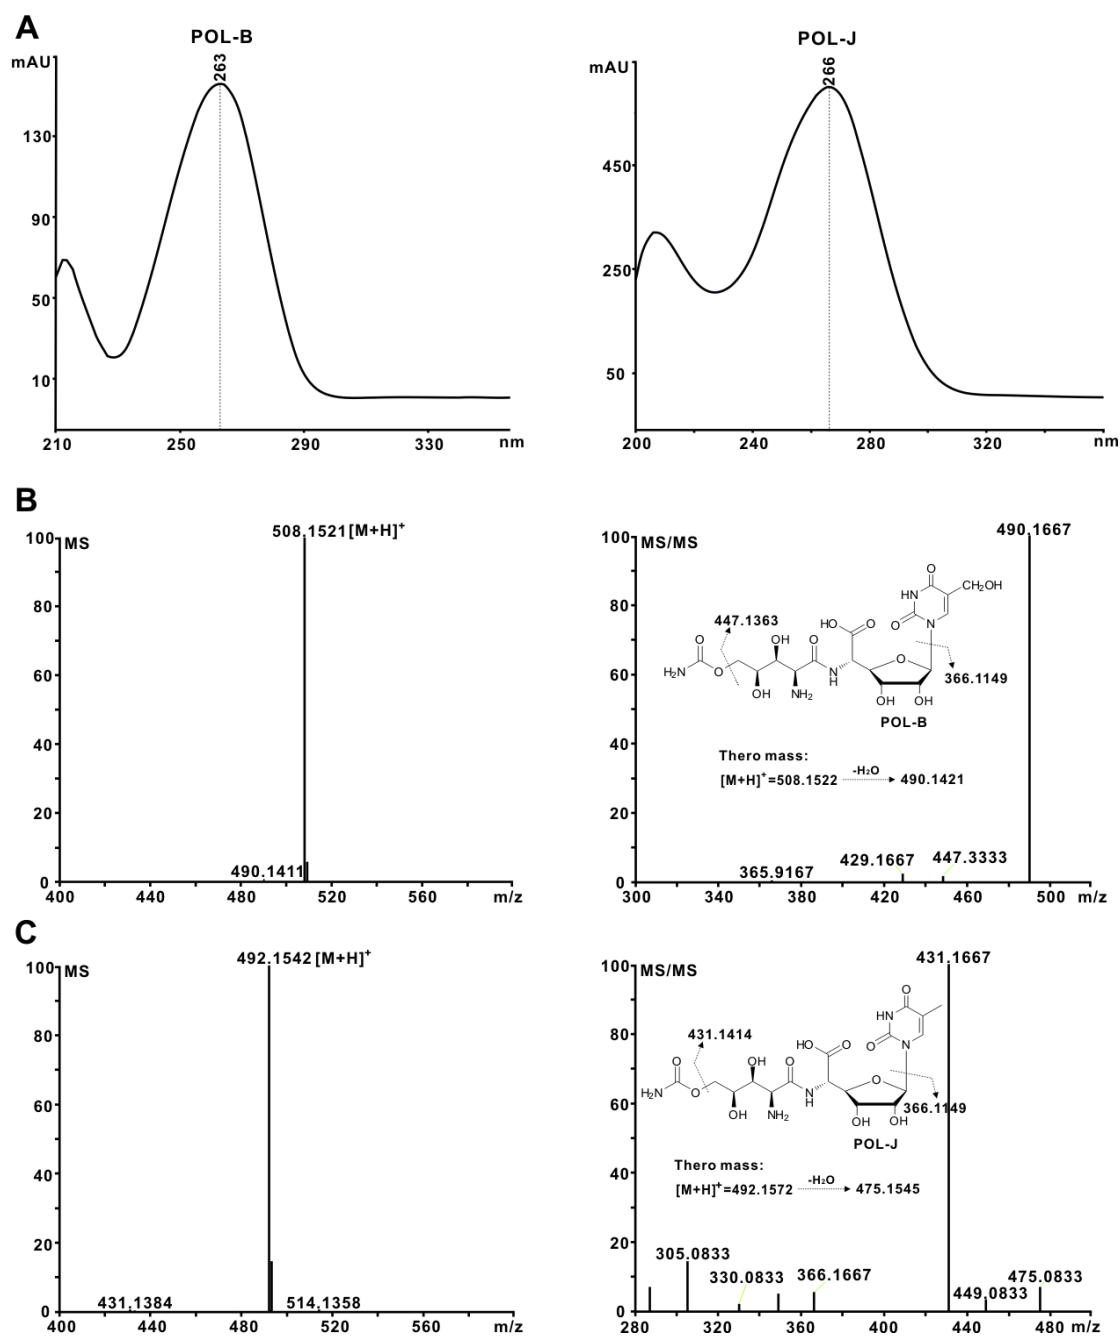

**Figure S1. HPLC and LC-HRMS analysis of the metabolites produced from the CXR14::pCHW201.**

(A) The UV spectrum of POL-B and POL-J. (B) LC-HRMS (left) and LC-HRMS/MS (right) analysis of POL-B produced by CXR14::pCHW201. (C) LC-HRMS (left) and LC-HRMS/MS (right) analysis of POL-J produced by CXR14::pCHW201.

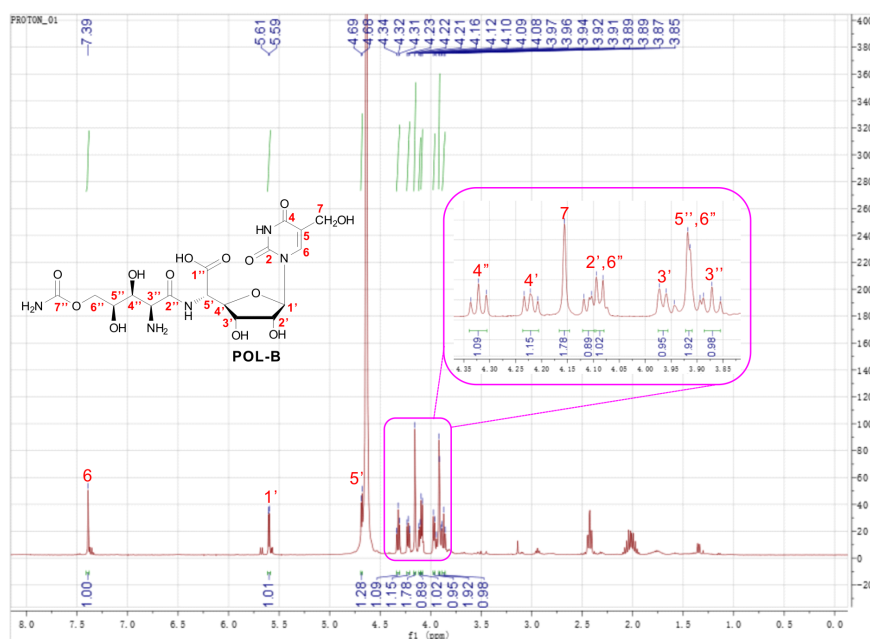

**Figure S2A.**  $^1\text{H}$  NMR data of POL-B.

$^1\text{H}$  NMR (400 MHz,  $\text{D}_2\text{O}$ )  $\delta$  7.39 (1H, s), 5.61 (1H, d,  $J = 8.0$  Hz), 4.69 (1H, d,  $J = 4.0$  Hz), 4.32 (1H, t,  $J = 8.0$  Hz), 4.22 (1H, t,  $J = 4.0$  Hz), 4.16 (2H, s), 4.12 (1H, d,  $J = 8.0$  Hz), 4.09 (1H, d,  $J = 4.0$  Hz), 3.96 (1H, t,  $J = 4.0$  Hz), 3.92 (2H, d,  $J = 4.0$  Hz), 3.89-3.85 (1H, m).

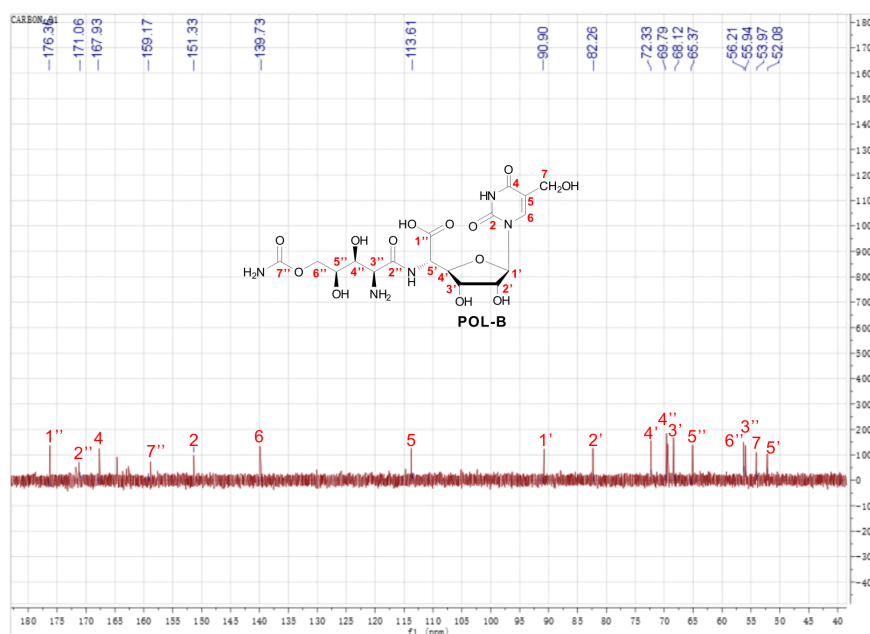

**Figure S2B.**  $^{13}\text{C}$  NMR data of POL-B.

$^{13}\text{C}$  NMR (400 MHz,  $\text{D}_2\text{O}$ ),  $\delta$  176.36, 171.06, 167.93, 159.17, 151.33, 139.73, 113.61, 90.90, 82.26, 72.33, 69.79, 68.12, 65.37, 56.21, 55.94, 53.97, 52.08.

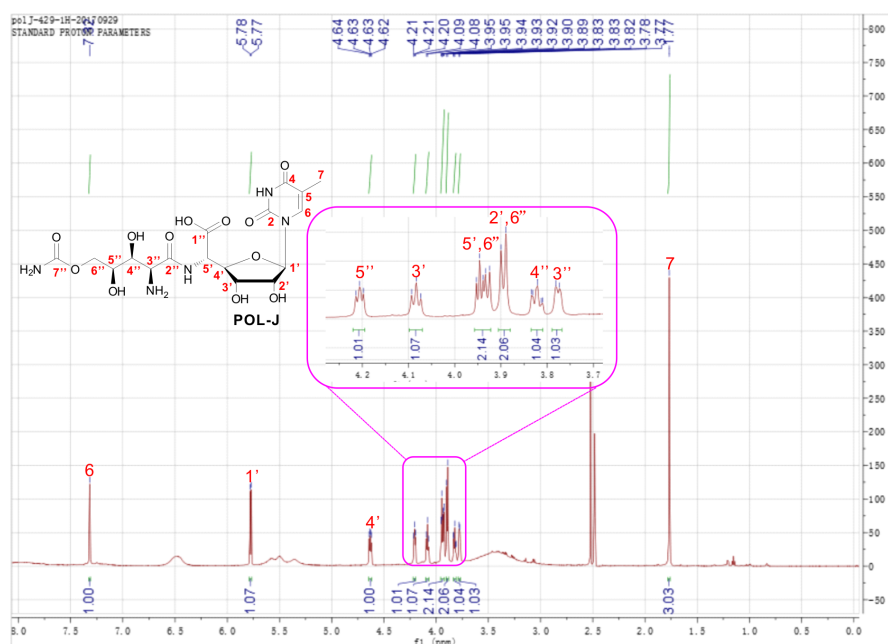

**Figure S3A.  $^1\text{H}$  NMR data of POL-J.**

$^1\text{H}$  NMR (600 MHz,  $\text{DMSO-d}_6$ )  $\delta$  7.32 (1H, s), 5.78 (1H, d,  $J = 6.0$  Hz), 4.63 (1H, t,  $J = 6.0$  Hz), 4.21 (1H, d,  $J = 6.0$  Hz), 4.08 (1H, t,  $J = 6.0$  Hz), 3.92-3.95 (2H, m), 3.90 (2H, d,  $J = 6.0$  Hz), 3.82 (1H, t,  $J = 6.0$  Hz), 3.78 (1H, d,  $J = 6.0$  Hz), 1.77 (3H, s).

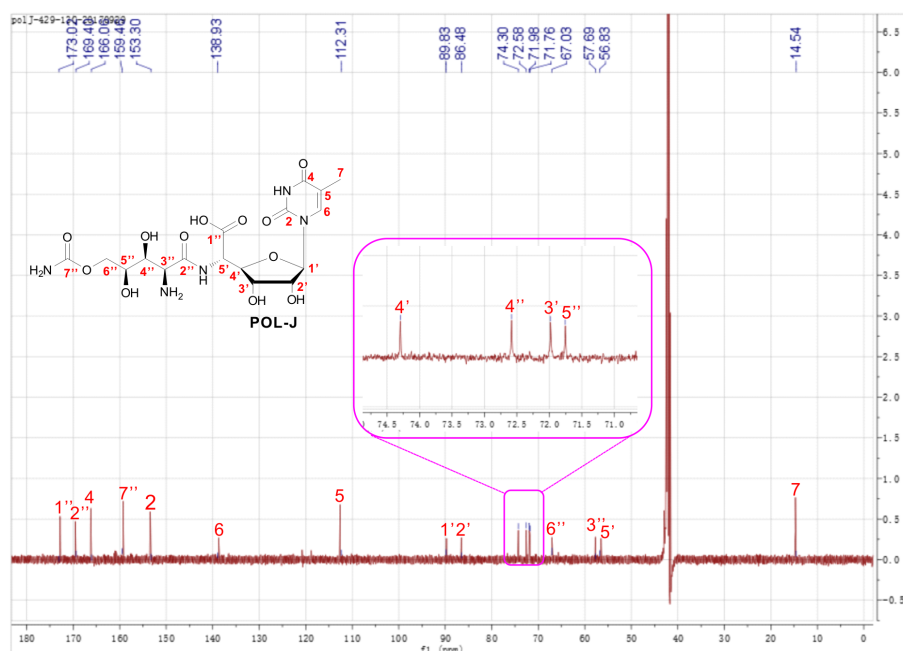

**Figure S3B.  $^{13}\text{C}$  NMR data of POL-J.**

$^{13}\text{C}$  NMR (600 MHz,  $\text{DMSO-d}_6$ )  $\delta$  173.02, 169.40, 166.06, 159.46, 153.30, 138.93, 112.31, 89.83, 86.48, 74.30, 72.58, 71.98, 71.76, 67.03, 57.69, 56.83, 14.54.

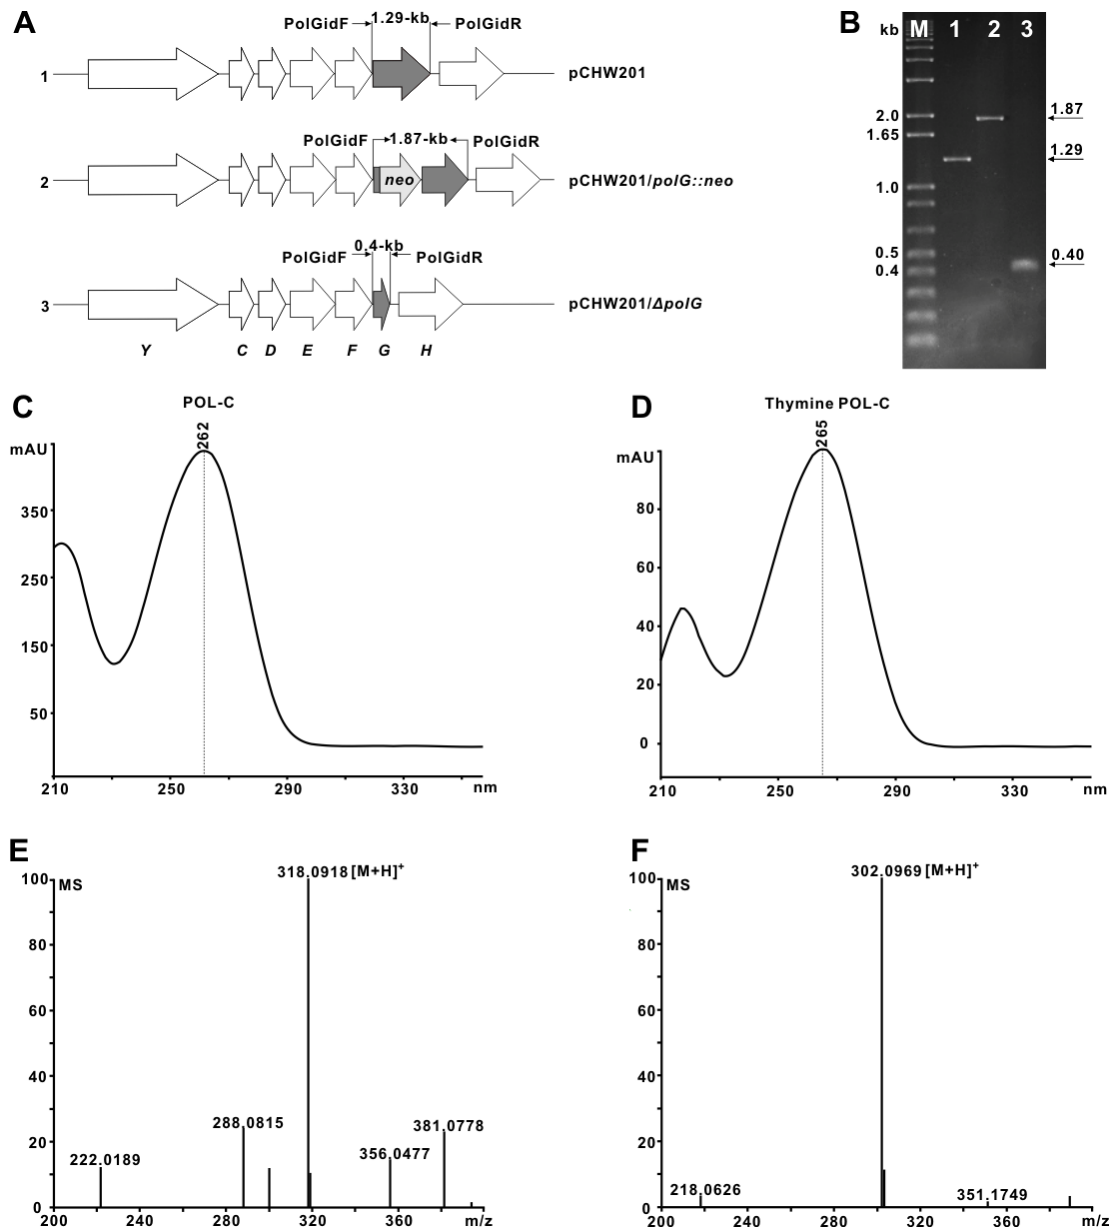

**Figure S4. In-frame deletion of *polG* on pCHW201 and HPLC/LC-HRMS analysis of the target metabolites produced by CXR14::pCHW201/ $\Delta$ *polG* recombinant.**

(A) Schematic illustration for the construction of *polG* via PCR-targeting technology. (B) PCR identification of the in-frame deletion mutant. (C) UV spectrum of POL-C. (D) UV spectrum of thymine POL-C. (E) LC-HRMS analysis of POL-C produced by CXR14::pCHW201/ $\Delta$ *polG*. (F) LC-HRMS analysis of thymine POL-C produced by CXR14::pCHW201/ $\Delta$ *polG*.



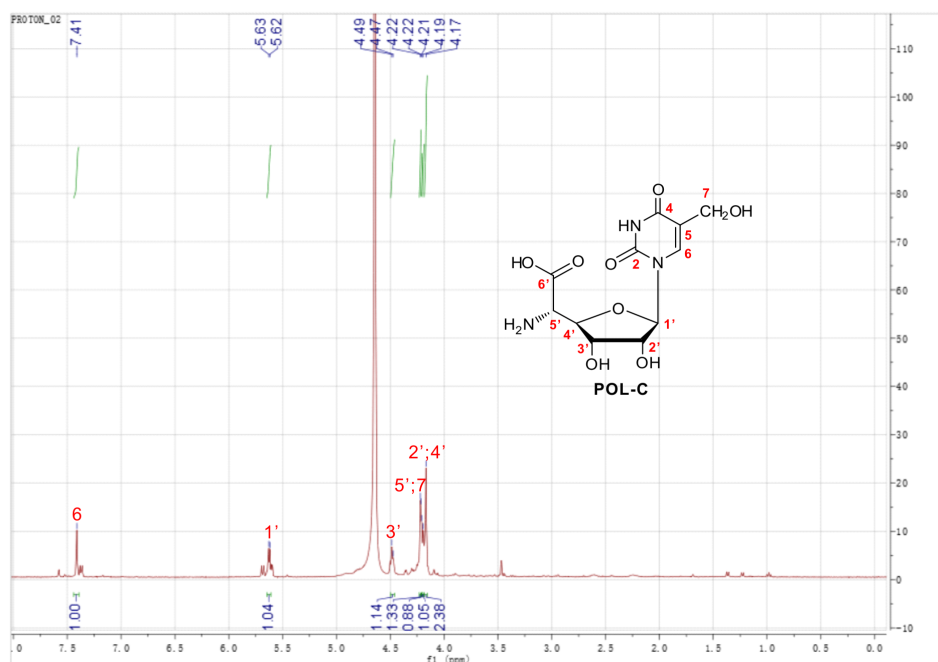

**Figure S5A.  $^1\text{H}$  NMR data of POL-C.**

$^1\text{H}$  NMR (400 MHz,  $\text{D}_2\text{O}$ )  $\delta$  7.41 (1H, s), 5.63 (1H, d,  $J = 4.0$  Hz), 4.49 (1H, d,  $J = 8.0$  Hz), 4.22 (1H, d,  $J = 4.0$  Hz), 4.21 (2H, s), 4.19 (1H, s), 4.17 (1H, s).

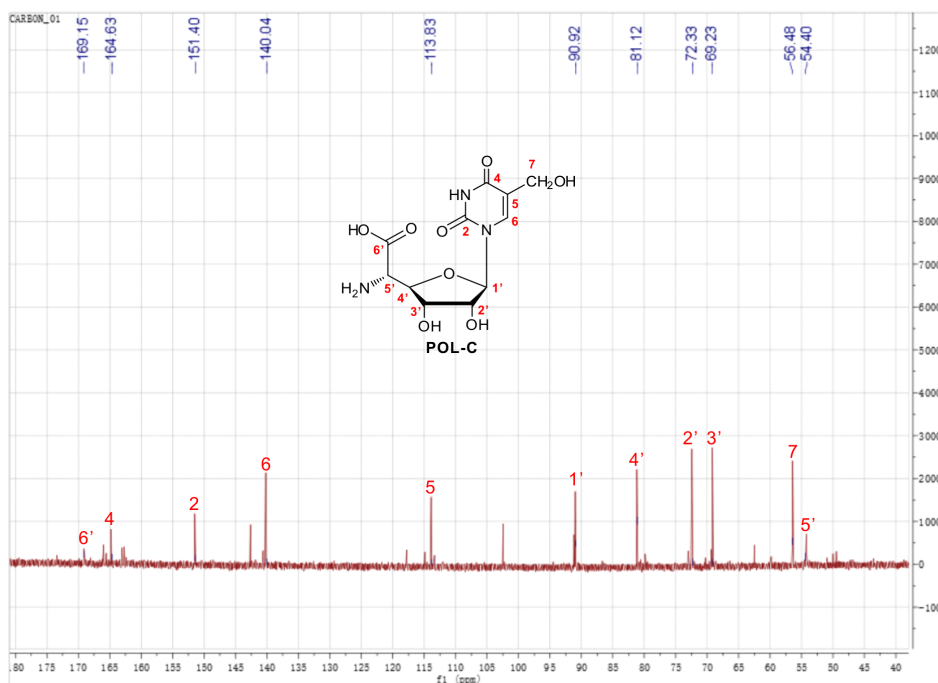

**Figure S5B.  $^{13}\text{C}$  NMR data of POL-C.**

$^{13}\text{C}$  NMR (400 MHz,  $\text{D}_2\text{O}$ )  $\delta$  169.15, 164.63, 151.40, 140.04, 113.83, 90.92, 81.12, 72.33, 69.23, 56.48, 54.40.

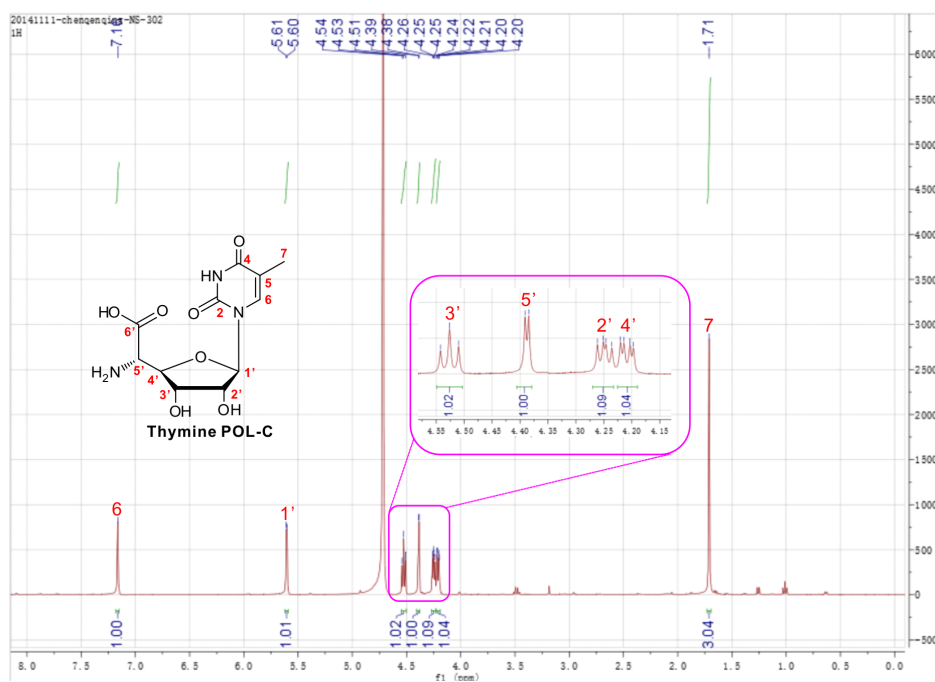

**Figure S6A.**  $^1\text{H}$  NMR data of thymine POL-C.

$^1\text{H}$  NMR (400 MHz,  $\text{D}_2\text{O}$ )  $\delta$  7.16 (1H, s), 5.61 (1H, d,  $J = 4.0$  Hz), 4.53 (1H, t,  $J = 8.0$  Hz), 4.39 (1H, d,  $J = 4.0$  Hz), 4.25 (1H, m), 4.21 (1H, m), 1.71 (3H, s).

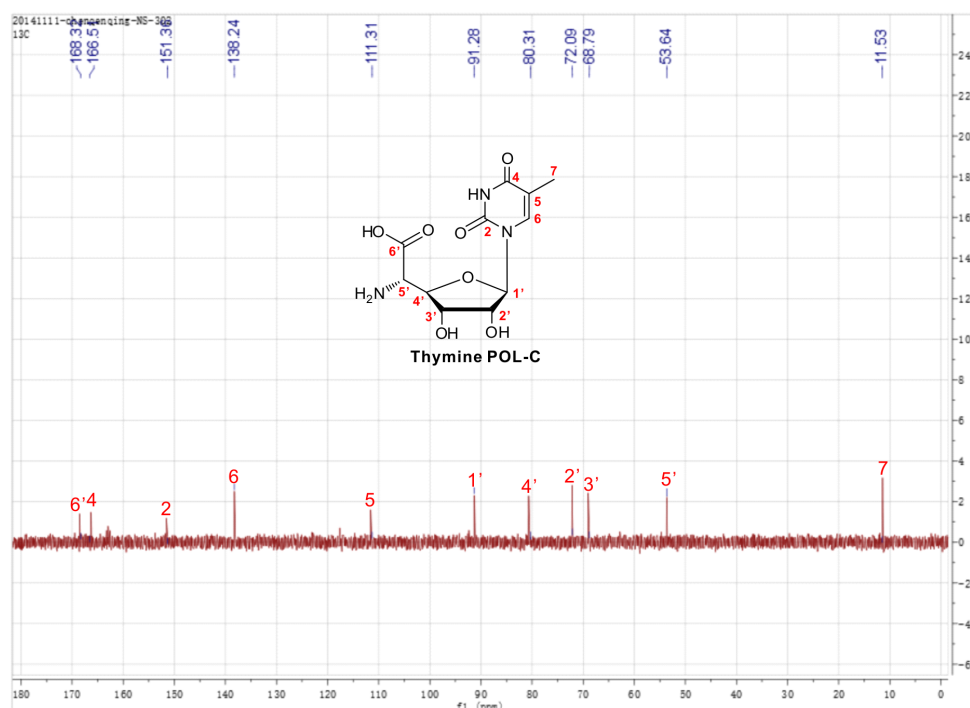

**Figure S6B.**  $^{13}\text{C}$  NMR data of thymine POL-C.

$^{13}\text{C}$  NMR (400 MHz,  $\text{D}_2\text{O}$ )  $\delta$  168.32, 166.51, 151.36, 138.24, 111.31, 91.28, 80.31, 72.09, 68.79, 53.64, 11.53.

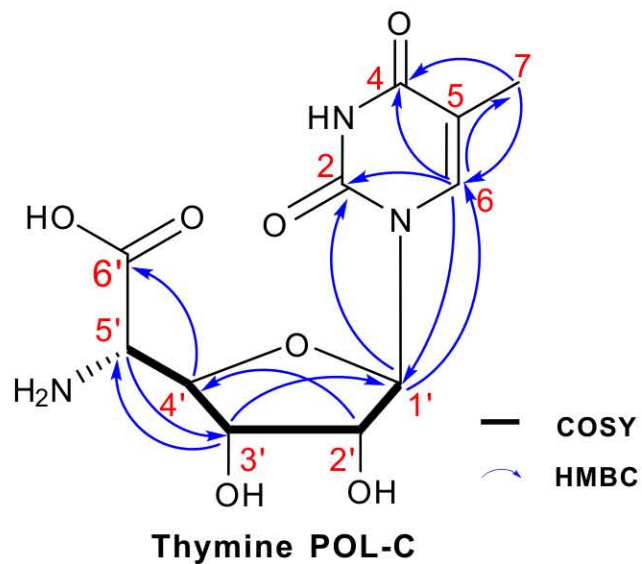

**Figure S6C. 2D NMR analysis of thymine POL-C.**

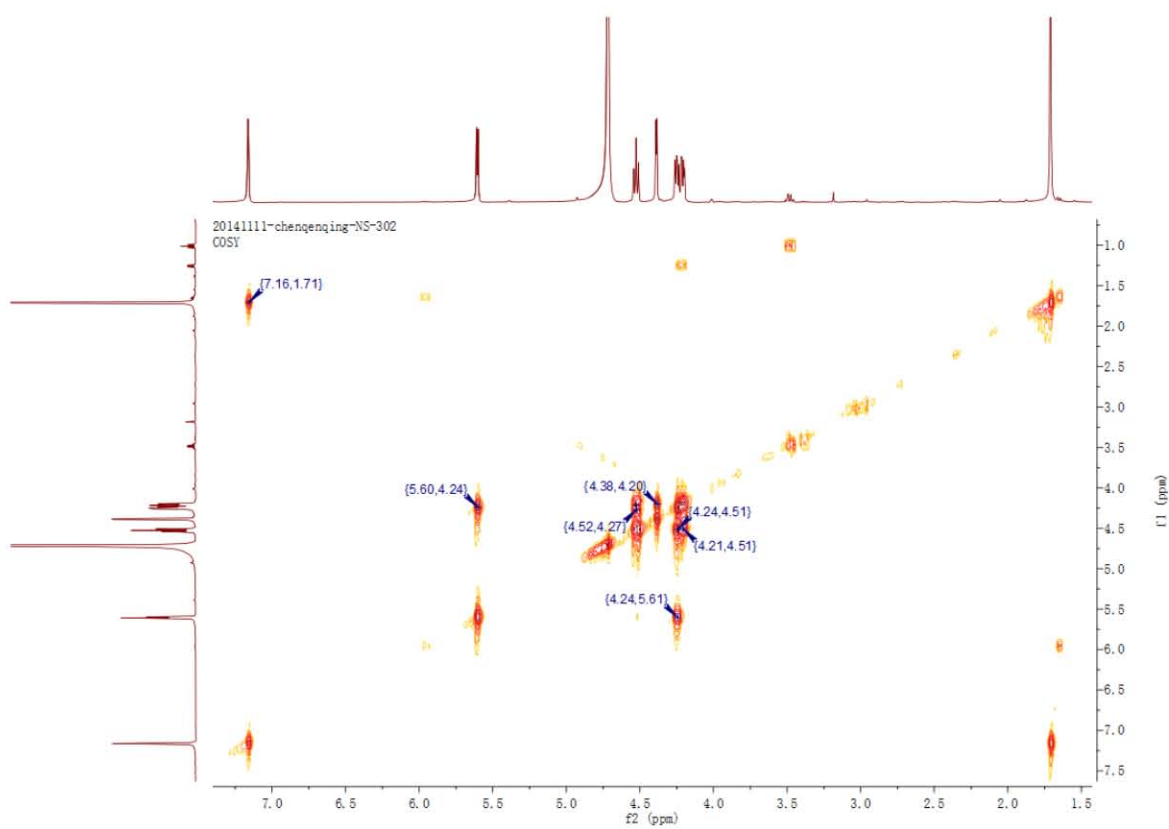

**Figure S6D. COSY NMR data of thymine POL-C**

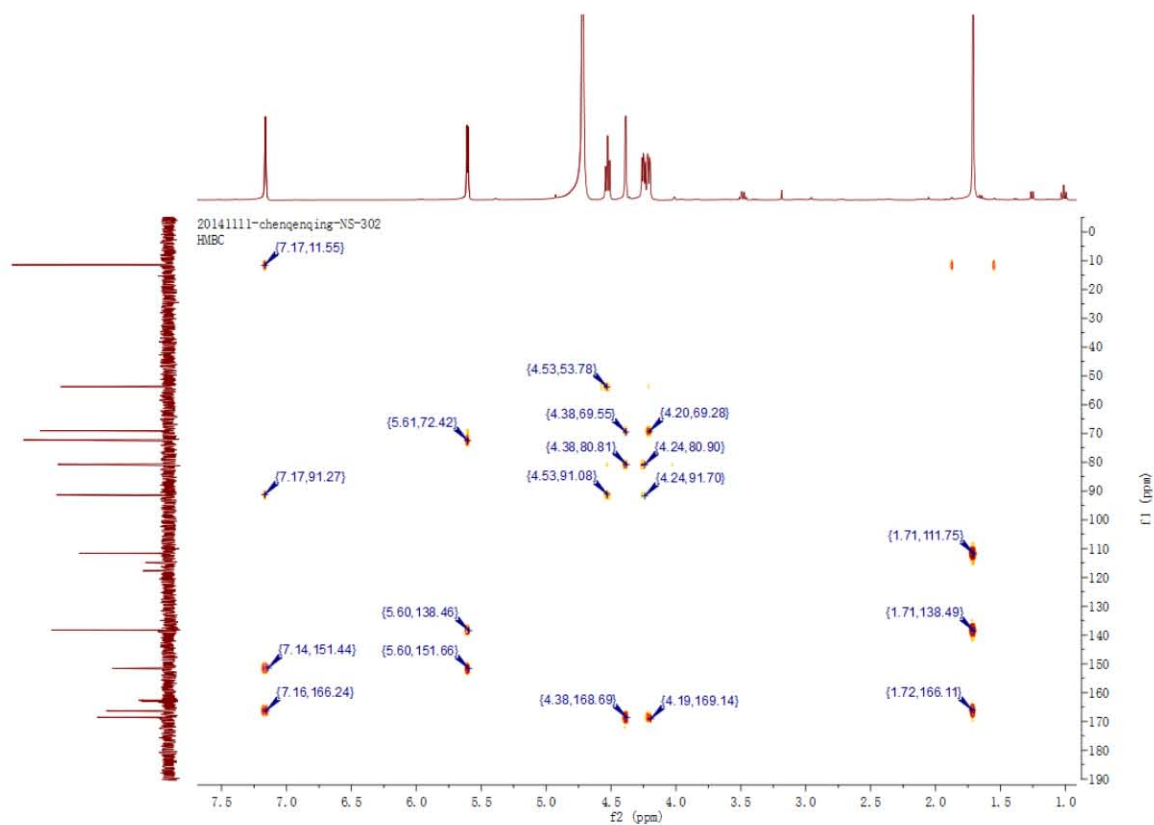

Figure S6E. HMBC NMR data of thymine POL-C.

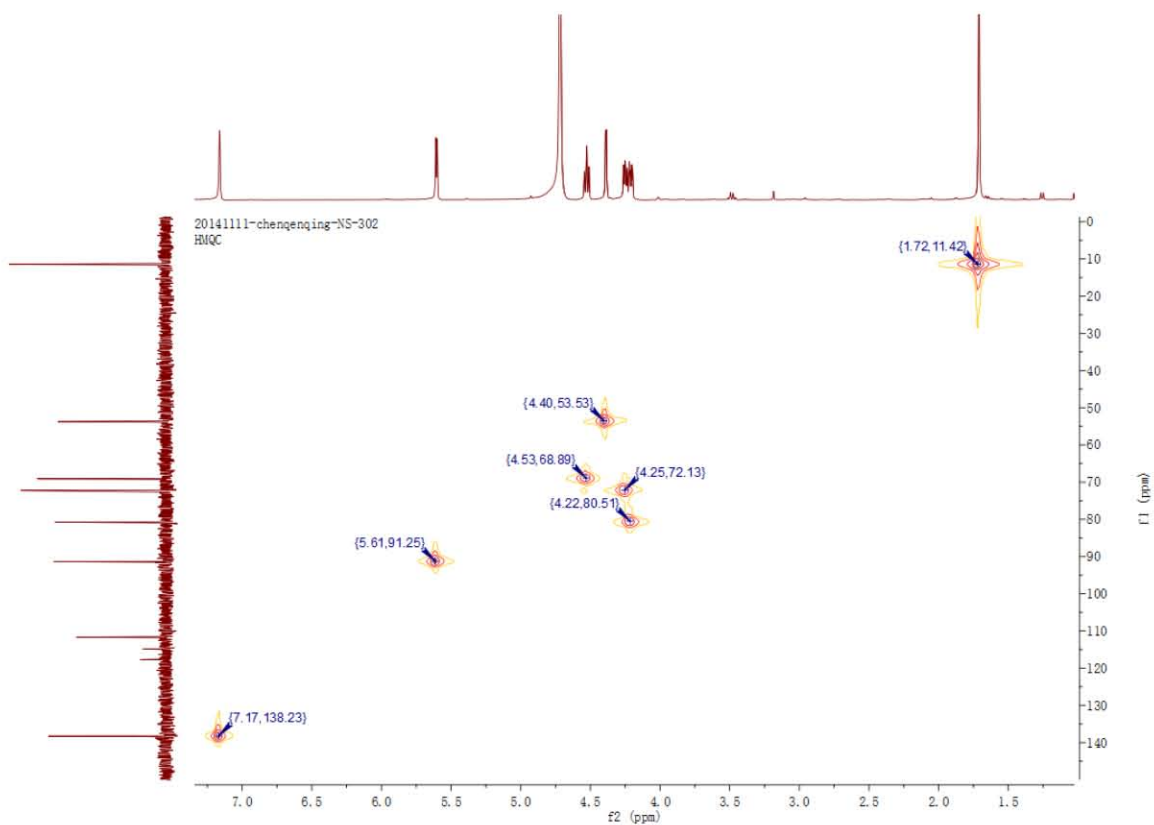

Figure S6F. HMQC NMR data of thymine POL-C.

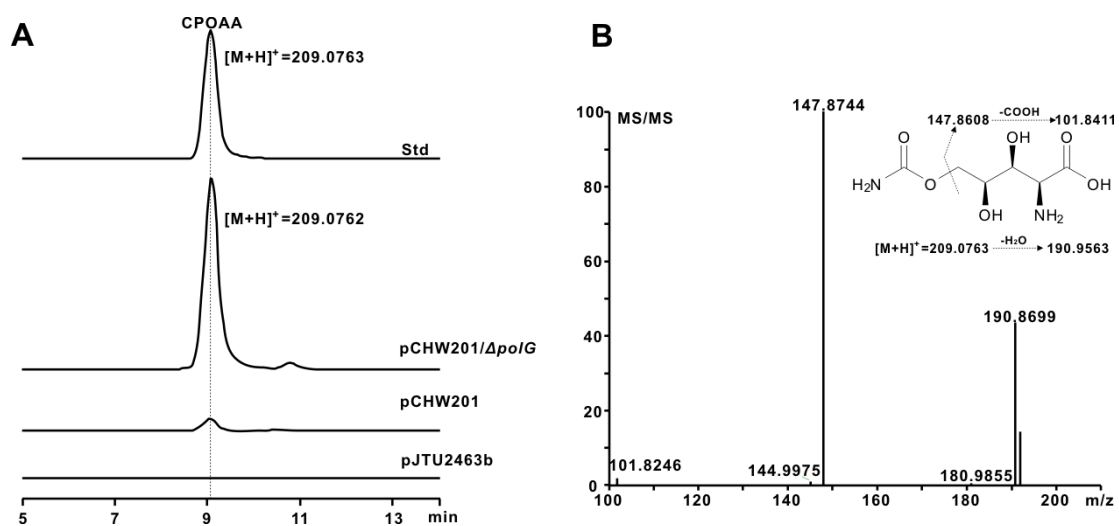

**Figure S7. LC-HRMS analysis of CPOAA produced from CXR14::pCHW201/ $\Delta$ polG recombinant.**

(A) Extract ion chromatography (EIC) analysis of the target metabolite (CPOAA) produced from CXR14::pCHW201/ $\Delta$ polG recombinant. (B) LC-HRMS/MS analysis of CPOAA produced from CXR14::pCHW201/ $\Delta$ polG recombinant and the fragmentation pattern of the authentic CPOAA standard.

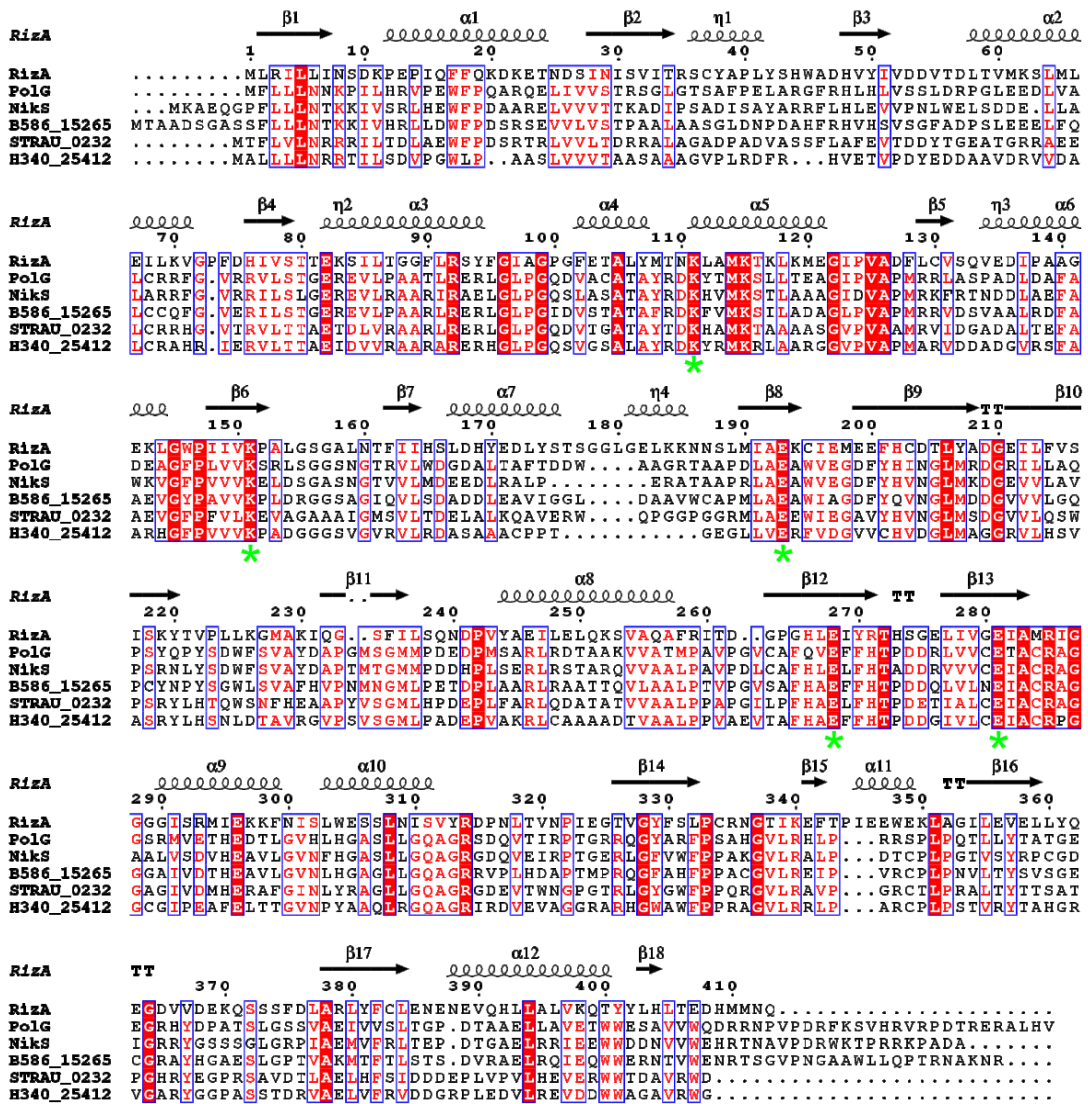

**Figure S8. Bioinformatics analysis of PolG with its homologs.**

Sequence alignment of PolG with its homologs using ESPrnt (4). Secondary structure of RizA (PDB: 4WD3) is shown on the top. RizA (GenBank: BAG72134.1) from *Bacillus subtilis subsp. subtilis*, NikS (GenBank: CAC11141.1) from *Streptomyces tendae*, STRAU\_0232 (GenBank: EPH46679.1) from *Streptomyces aurantiacus* JA 4570, H340\_25412 (GenBank: EME97668.1) from *Streptomyces mobaraensis* NBRC 13819. The conserved ATP-binding sites are highlighted with green asterisk.

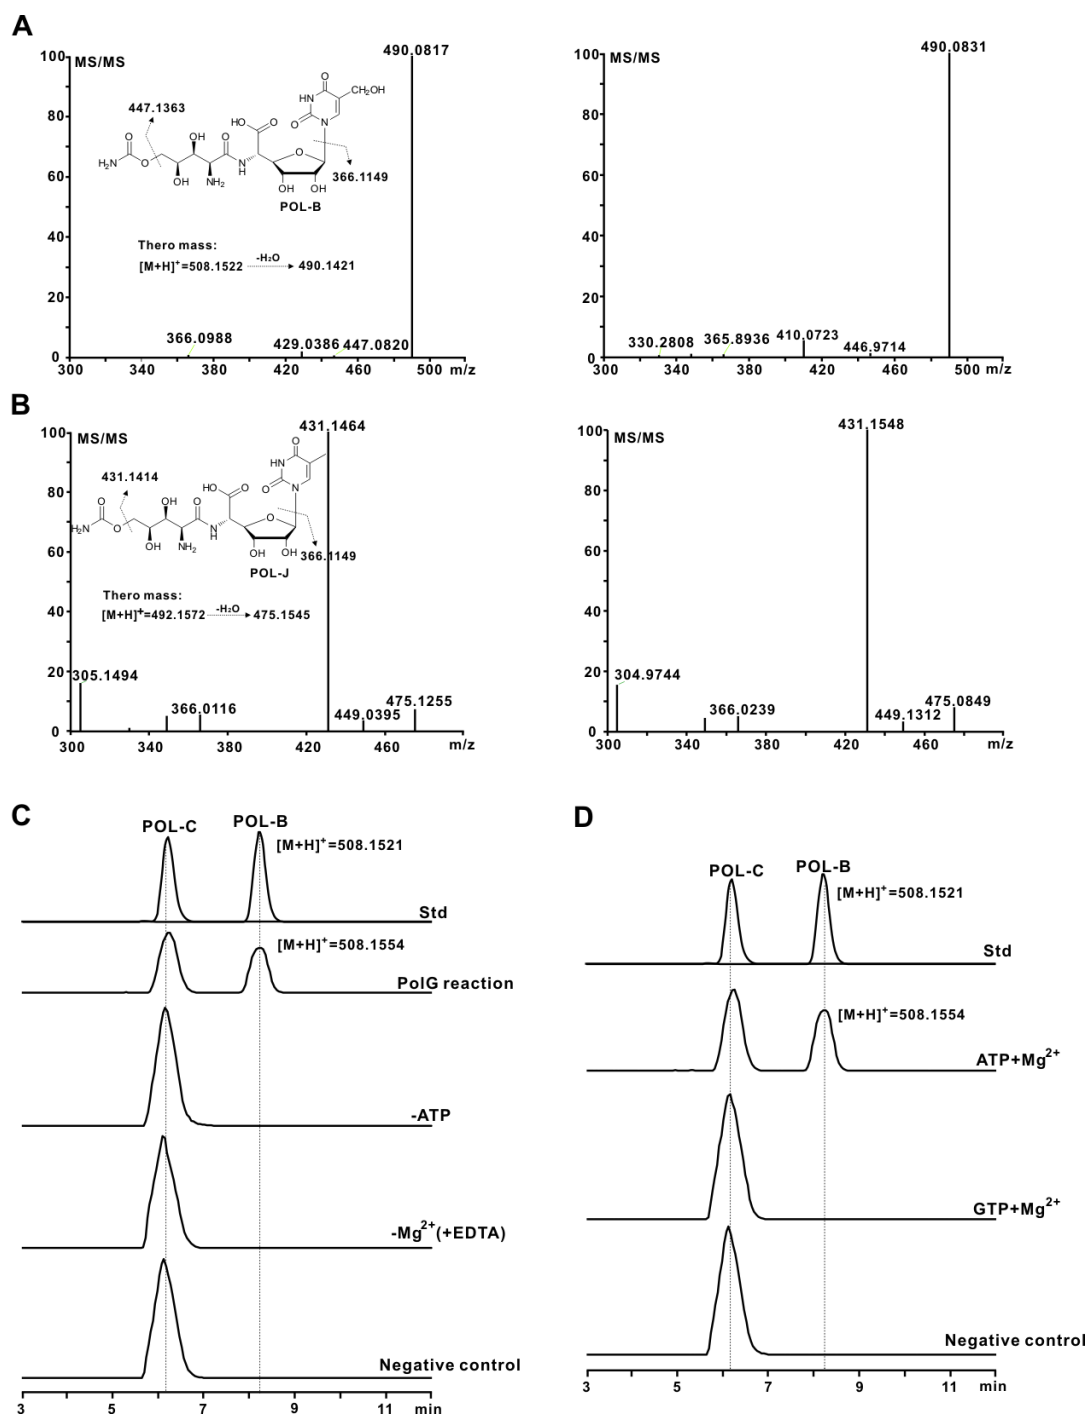

**Figure S9. LC-HRMS analysis of the PolG-catalyzed reactions.**

(A) LC-HRMS/MS analysis of the authentic POL-B standard and the target product (POL-B) from the PolG-catalyzed reaction using POL-C as substrate. (B) LC-HRMS/MS analysis of the authentic POL-J standard and the target product (POL-J) from the PolG-catalyzed reaction using thymine POL-C as substrate. (C) LC-MS analysis of the PolG reactions; the results indicated that both ATP and  $Mg^{2+}$  are indispensable for PolG activity. (D) LC-MS analysis of the PolG-catalyzed reactions (with ATP replaced by GTP).

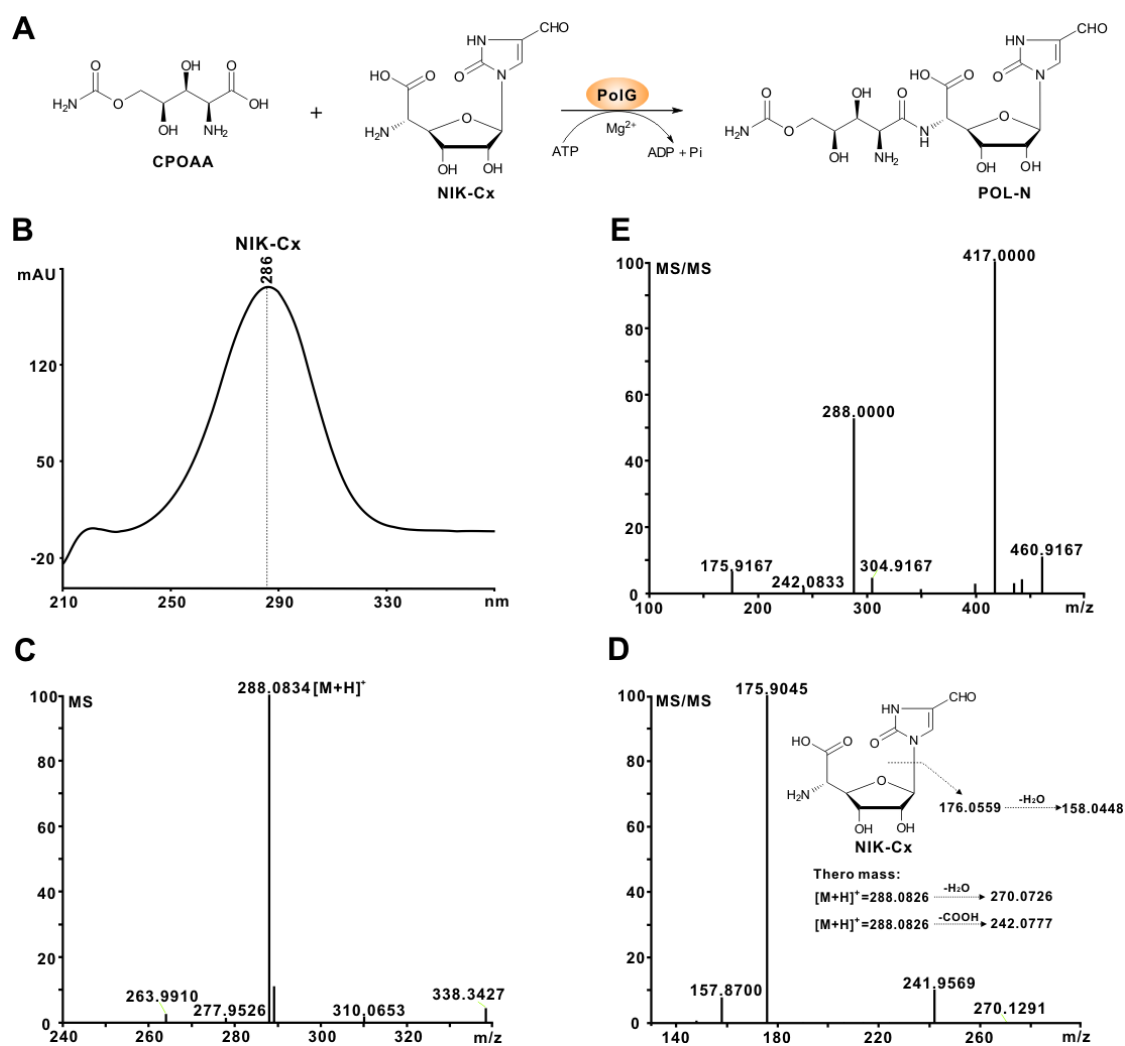

**Figure S10. HPLC and LC-HRMS analysis of PolG-catalyzed reaction using NIK-Cx as substrate.**

(A) Scheme of the PolG-catalyzed reaction. (B) UV spectrum of NIK-Cx. (C) LC-HRMS analysis of NIK-Cx. (D) LC-HRMS/MS analysis of NIK-Cx and the fragmentation pattern of NIK-Cx. (E) LC-HRMS/MS analysis of the authentic POL-N standard.



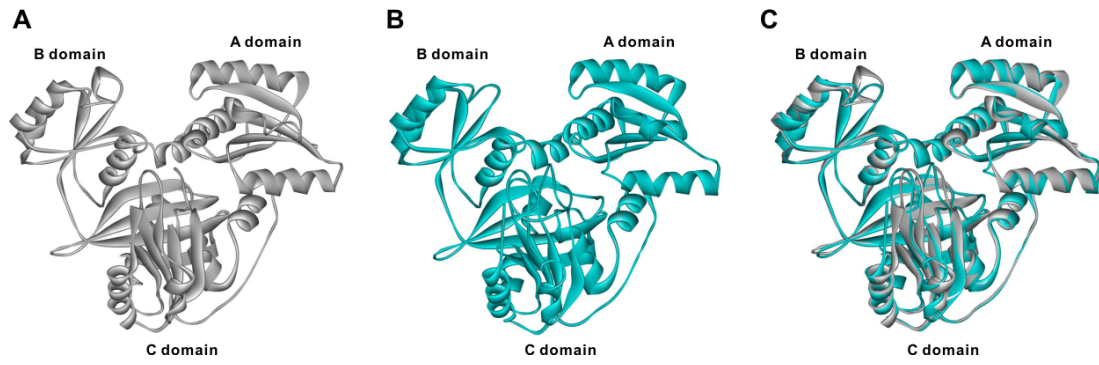

**Figure S11. Structural comparison of RizA and PolG proteins.**

(A) Structure of RizA (PDB: 4WD3). (B) Structure model of PolG. (C) Superimposition of PolG structure (Cyan) and RizA (Gray).

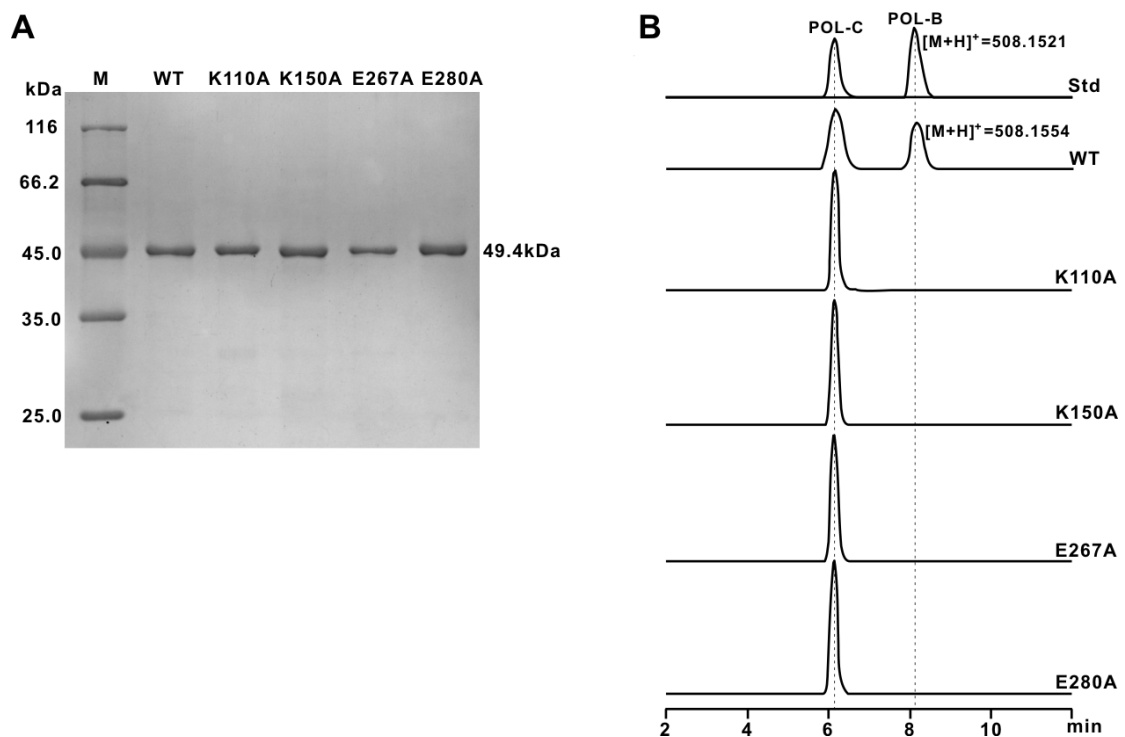

**Figure S12. SDS-PAGE analysis and *in vitro* characterization of PolG variants.**

(A) SDS-PAGE analysis of PolG and its variants (5  $\mu$ g per lane). (B) Extract ion chromatography (EIC) analysis of the reactions catalyzed by PolG and its variants using POL-C as substrate.

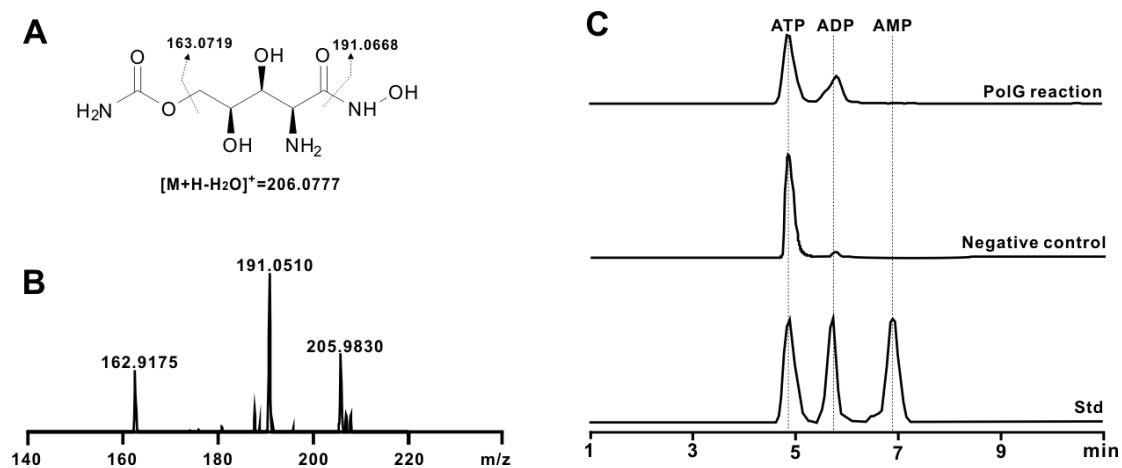

**Figure S13. LC-HRMS analysis of the proposed mechanism of PolG-catalyzed reaction.**

(A) Theoretical fragmentation pattern of compound **2**. (B) LC-HRMS/MS analysis of the compound **2** from the PolG-catalyzed reaction (with NH<sub>2</sub>OH added). (C) Extract ion chromatography (EIC) analysis of the deduced ADP and AMP products from the PolG-catalyzed reaction.

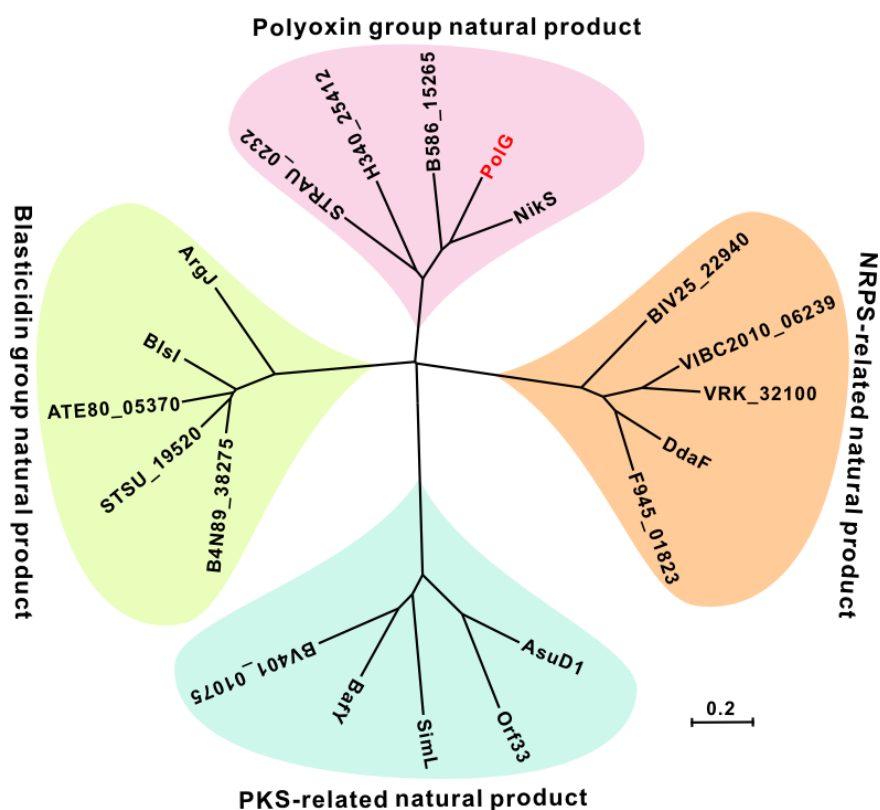

**Figure S14. Phylogenetic analysis of PolIG against other ATP-dependent ligases.**

NikS (GenBank: CAC11141.1) from *Streptomyces tendae*, STRAU\_0232 (GenBank: EPH46679.1) from *Streptomyces aurantiacus* JA 4570, H340\_25412 (GenBank: EME97668.1) from *Streptomyces mobaraensis* NBRC 13819, B586\_15265 (GenBank: ALL56250.1) from *Mycobacterium haemophilum* DSM 44634. DdaF (GenBank: ADN39488.1) from *Pantoea agglomerans*, F945\_01823 (GenBank: EPF73944.1) from *Acinetobacter rudis* CIP 110305, VIBC2010\_06239 (GenBank: EFP97961.1) from *Vibrio caribbeanicus* ATCC BAA-2122, VRK\_32100 (GenBank: KUI97647.1) from *Vibrio* sp. MEBiC08052, BIV25\_22940 (GenBank: OII94455.1) from *Streptomyces* sp. MUSC 14. BafY (GenBank: ADC79614.1) from *Streptomyces lohii*, SimL (GenBank: AAG34183.1) from *Streptomyces antibioticus*, AsuD1 (GenBank: ADI58645.1) from *Streptomyces nodosus* subsp. *asukaensis*, Orf33 (GenBank: AAX98208.1) from *Streptomyces aizunensis*, BV401\_01075 (GenBank: AQA09292.1) from *Streptomyces autolyticus*. BlsI (GenBank: AAP03123.1) from *Streptomyces griseochromogenes*, ArgJ (GenBank: AGG35700.1) from *Streptomyces arginensis*, B4N89\_38275 (GenBank: OPC78500.1) from *Streptomyces scabrisporus*, ATE80\_05370 (GenBank: KUH39827.1) from *Streptomyces kanasensis*, STSU\_19520 (GenBank: EIF90686.1) from *Streptomyces tsukubensis* NRRL18488.

### 3. Supplementary Tables

**Table S1. Optimized sequence for PolG**

|                                                                                                                                                                                                                                                                                                                                                                                                                                                                                                                                                                                                                                                                                                                                                                                                                                                                                                                                                                                                                                                                                                                                                                                                                                                                                                                                                                                                                                                                                                                                                      |
|------------------------------------------------------------------------------------------------------------------------------------------------------------------------------------------------------------------------------------------------------------------------------------------------------------------------------------------------------------------------------------------------------------------------------------------------------------------------------------------------------------------------------------------------------------------------------------------------------------------------------------------------------------------------------------------------------------------------------------------------------------------------------------------------------------------------------------------------------------------------------------------------------------------------------------------------------------------------------------------------------------------------------------------------------------------------------------------------------------------------------------------------------------------------------------------------------------------------------------------------------------------------------------------------------------------------------------------------------------------------------------------------------------------------------------------------------------------------------------------------------------------------------------------------------|
| <p>ATGTTTTACTGCTGAATAACAAGCCGATTCTGCACCGCTTCCGGAATGGTTCCGCAGGCCCGTCAGGAACTGATTGTG<br/>         GTGAGTACCCGTAGTGGTCTGGGTACCAGCGCCTTCCCGAACTGGCACGTGGCTTCGTCTGACCTGGTTAGCAG<br/>         TCTGGATCGCCCTGGCCTGGAAGAGGATCTGGTGGCACTGTGCCGCCGTTTTGGCGTGCGCCGTGTTCTGAGCACCGGCG<br/>         AACCGGAGGTTCTGCCTGCAGCCACACTGCGCGAACGTCTGGGTCTGCCGGTCAGGATGTGGCCTGTGCCACCGCTAC<br/>         CGCGATAAATACACCATGAAAAGCCTGCTGACAGAAGCCGGCATTCCGGTTGCCCTATGCGTCGTCTGGCCAGCCCTGC<br/>         AGACTTAGATGCATTCGCCGACGAAGCCGGCTTCCGCTGGTGGTAAAAGTCGCTTAAGCGGCGGCAGTAATGGTACA<br/>         CGCGTGTCTGGGATGGCGATGCCCTGACCGCATTACCGATGATTGGGCCGCCGGTGTACAGCAGCACCTGATCTGGC<br/>         AGAAGCCTGGGTGGAGGGTGACTTCTACCACATCAATGGCCTGATGCGCGATGGTGCATTCTGCTGGCACAGCCGAGT<br/>         TACCAGCCGTACAGCGATTGGTTCAGTGTGGCTTATGATGCCCCGGGTATGAGTGGCATGATGCCGGATGAAGATCCGAT<br/>         GAGCGCACGTCTGCGTGATACCGCCGCCAAAGTGGTTGCCACCATGCCGGCCGTTCCGGGTGTTTGCGCCCTTCAGGTGG<br/>         AGTTCTTTCACACCCCGGATGACCGCCTGGTTGTGTGTGAAACCGCATGTCGCGCCGGTGGTAGCCGTATGGTGGAAACC<br/>         CACGAAGATACTGGGCGTGCATCTGCATGGTGCCAGTCTGCTGGGTCAAGCAGGCCGAGTGTAGGTTACCATTC<br/>         GTCGACCGGCCGTCGCCAGGGTTATGCACGCTTCCGAGCGCACACGGCGTTCTGCGTCATTTACCTCGCCGAGCCCG<br/>         TTACCGCAGACTGCTGTATACCGCAACCGGTGAAGAGGGCCGCCATTATGATCCGGCAACCAGCCTGGGCAGTAGCG<br/>         TGGCAGAAATTGGGTGAGTCTGACAGGCCCGGATACAGCAGCCGAATTACTGGCAGTGGAACCTGGTGGGAAAGCG<br/>         CCGTGGTTTGGCAGGATCGCCGTAATCCGGTTCCTGATCGCTTAAAAGCGTGCATCGCGTTCGCCCGGATACACGCGAA<br/>         CGTGCATTACACGTGTA</p> |
|------------------------------------------------------------------------------------------------------------------------------------------------------------------------------------------------------------------------------------------------------------------------------------------------------------------------------------------------------------------------------------------------------------------------------------------------------------------------------------------------------------------------------------------------------------------------------------------------------------------------------------------------------------------------------------------------------------------------------------------------------------------------------------------------------------------------------------------------------------------------------------------------------------------------------------------------------------------------------------------------------------------------------------------------------------------------------------------------------------------------------------------------------------------------------------------------------------------------------------------------------------------------------------------------------------------------------------------------------------------------------------------------------------------------------------------------------------------------------------------------------------------------------------------------------|

**Table S2. PCR primers used in this study**

| Primers  | Sequence ( 5'--3' )                                        |
|----------|------------------------------------------------------------|
| polGtgtF | GGACTGGGTACCAGCGCCTTCCCGAGCTCGCGCGCGGCTCTAGAGCTATTCCAGAAGT |
| polGtgtR | CAAGAGGGTCTGCGGCAGGGGCTTCCGCCGCGGCAGGTGACTAGTCTGGATGCCGACG |
| polGidF  | GGGCGTGACGTGCTCAGACAT                                      |
| polGidR  | CCCGCAGGCGAAAGGAACT                                        |
| polGexF  | GTCCATATGTTTTACTGCTGAA                                     |
| polGexR  | GGAATTCTTACACGTGTAATGCAC                                   |
| K110A-F  | CGCGATGCGTACACCATGAAAAG                                    |
| K110A-R  | GGTGTACGCATCGCGGTAGGCGG                                    |
| K150A-F  | GTGGTGGCGAGTCGCTTAAGC                                      |
| K150A-R  | GCGACTCGCCACCACCAGCG                                       |
| K188A-F  | CTGGCAGCGCCTGGGTGGAGG                                      |
| K188A-R  | CCAGGCCGCTGCCAGATCAGGTGC                                   |
| E267A-F  | CAGGTGGCGTCTTTTACACCCCG                                    |
| E267A-R  | GAAAGAACGCCACCTGAAAGGCGC                                   |
| E280A-F  | GTGTGTGCGACCGCATGTCGCGC                                    |
| E280A-R  | GCGGTCGCACACACAACCAGGCGG                                   |

#### 4. Supplementary References

1. Gust B, Challis GL, Fowler K, Kieser T, Chater KF. 2003. PCR-targeted *Streptomyces* gene replacement identifies a protein domain needed for biosynthesis of the sesquiterpene soil odor geosmin. *Proc Natl Acad Sci U S A* 100:1541-6.
2. Chen W, Huang T, He X, Meng Q, You D, Bai L, Li J, Wu M, Li R, Xie Z, Zhou H, Zhou X, Tan H, Deng Z. 2009. Characterization of the polyoxin biosynthetic gene cluster from *Streptomyces cacaoi* and engineered production of polyoxin H. *J Biol Chem* 284:10627-38.
3. Moon M, Van Lanen SG. 2010. Characterization of a dual specificity aryl acid adenylation enzyme with dual function in nikkomycin biosynthesis. *Biopolymers* 93:791-801.
4. Robert X, Gouet P. 2014. Deciphering key features in protein structures with the new ENDscript server. *Nucleic Acids Res* 42:W320-4.
